# Supplementary material
Source: PubMed Central journal article supplement (PMC6643032)

## Supporting Information

**Supplemental Table 1. Yeast strains used in this study**

| <b>Strain</b> | <b>Genotype</b>                                                                                                   | <b>Reference</b> |
|---------------|-------------------------------------------------------------------------------------------------------------------|------------------|
| W303          | <i>MATa, ade2-1, leu2-3, ura3, trp1-1, his3-11,15, can1-100, GAL</i>                                              | (11)             |
| A1467         | <i>MATa, ade2-1, leu2-3, ura3, trp1-1, his3-11,15, can1-100, GAL, cdc34-2</i>                                     | (11)             |
| A1469         | <i>MATa, ade2-1, leu2-3, ura3, trp1-1, his3-11,15, can1-100, GAL, cdc53-1</i>                                     | (11)             |
| A2594         | <i>MATa, ade2-1, leu2-3, ura3, trp1-1, his3-11,15, can1-100, GAL, cdc28-4, MET-</i>                               | (11)             |
| A17188        | <i>MATa, ade2-1, leu2-3, ura3, trp1-1, his3-11,15, can1-100, GAL, cdc34-2, cdc28-as1</i>                          | (11)             |
| GY3706        | <i>MATa, his3-11, leu2-3,112, trp1-1, ura3-52, ade2-1, can1-100, GAL+, bar1, EXO84-12MYC::LEU2</i>                | This study       |
| DMY349        | <i>MATa, his3-11, leu2-3,112, trp1-1, ura3-52, ade2-1, can1-100, GAL+, bar1</i>                                   | (54)             |
| GY3701        | <i>Mata, ura3-52, leu2-3,112, his3Δ200, trp1, LA-, exo84Δ::HIS3 (CEN, EXO84, LEU2)</i>                            | This study       |
| GY3702        | <i>Mata, ura3-52, leu2-3,112, his3Δ200, trp1, LA-, exo84Δ::HIS3 (CEN, exo84-5A, LEU2)</i>                         | This study       |
| GY3703        | <i>Mata, ura3-52, leu2-3,112, his3Δ200, trp1, LA-, exo84Δ::HIS3 (CEN, exo84-5E, LEU2)</i>                         | This study       |
| GY3774        | <i>MATa, ade2-1, leu2-3, ura3, trp1-1, his3-11,15, can1-100, GAL, cdc34-2, exo84Δ::HIS3 (CEN, EXO84, LEU2)</i>    | This study       |
| GY3775        | <i>MATa, ade2-1, leu2-3, ura3, trp1-1, his3-11,15, can1-100, GAL, cdc34-2, exo84Δ::HIS3 (CEN, EXO84-5E, LEU2)</i> | This study       |
| GY3776        | <i>MATa, ade2-1, leu2-3, ura3, trp1-1, his3-11,15, can1-100, GAL, cdc34-2, exo84Δ::HIS3 (CEN, EXO84-5E, LEU2)</i> | This study       |
| GY3846        | <i>Mata, ura3-52, leu2-3,112, his3Δ200, trp1, LA-, exo84Δ::HIS3 (CEN, EXO84, LEU2), EXO70-GFP::URA3</i>           | This study       |
| GY3847        | <i>Mata, ura3-52, leu2-3,112, his3Δ200, trp1, LA-, exo84Δ::HIS3 (CEN, exo84-5A, LEU2), EXO70-GFP::URA3</i>        | This study       |
| GY3848        | <i>Mata, ura3-52, leu2-3,112, his3Δ200, trp1, LA-, exo84Δ::HIS3 (CEN, exo84-5E, LEU2), EXO70-GFP::URA3</i>        | This study       |
| GY3791        | <i>MATa sec3-2 ura3-52 leu2-3,112, sec3-2, exo84Δ:: KanMX6, (CEN, EXO84, LEU2)</i>                                | This study       |
| GY3792        | <i>MATa sec3-2 ura3-52 leu2-3,112, sec3-2, exo84Δ:: KanMX6, (CEN, exo84-5A, LEU2)</i>                             | This study       |
| GY3793        | <i>MATa sec3-2 ura3-52 leu2-3,112, sec3-2, exo84Δ:: KanMX6, (CEN, exo84-5E, LEU2)</i>                             | This study       |

**Supplemental Table 2. Plasmids used in this study**

| <b>Plasmid</b> | <b>Description</b>                                                                        | <b>Reference</b> |
|----------------|-------------------------------------------------------------------------------------------|------------------|
| pG338          | <i>pRS315-EXO84, LEU2, CEN</i>                                                            | (68)             |
| pG1621         | <i>pRS315-EXO84-5A (T28A, S31A, S291A, S482A, S716A), LEU2, CEN</i>                       | This study       |
| pG1623         | <i>pRS315-EXO84-5E (T28E, S31E, S291E, S482E, S716E), LEU2, CEN</i>                       | This study       |
| pG778          | <i>pRS305-EXO84-12MYC, LEU2</i> , integration into <i>EXO84</i> by cutting with BglII     | This study       |
| pG465          | <i>pGeX2T-EXO84</i>                                                                       | This study       |
| pG1849         | <i>pGeX2T-exo84-5A (T28A, S31A, S291A, S482A, S716A)</i>                                  | This study       |
| pNB880         | <i>pRS306-EXO70-GFP, URA3</i> , integration into <i>EXO70</i> gene by cutting with BstEII | Peter Novick lab |

**FIGURE LEGENDS**

**Supplemental Figure S1. Mutation of single Cdk1 consensus site did not affect Exo84 phosphorylation by Cln2-Cdk1.** *In vitro* Cln2-Cdk1 kinase assays were performed with wild type Exo84 and *exo84-A* mutants, which lack one of the five Cdk1 phosphorylation sites (T<sup>28</sup>, S<sup>31</sup>, S<sup>291</sup>, S<sup>482</sup>, S<sup>716</sup>). The phosphorylation level of *Exo84-A* mutants by Cln2-Cdk1 is similar to that of wild type Exo84. GST-Exo84 and GST-*exo84-A* mutants were purified from *E. coli* and incubated with Cln2-Cdk1 in the presence of  $\gamma$ -[<sup>32</sup>P]ATP. Exo84 phosphorylation was detected by autoradiography (top). The Corresponding Coomassie blue-stained gel is shown on the bottom.

Fig. S1

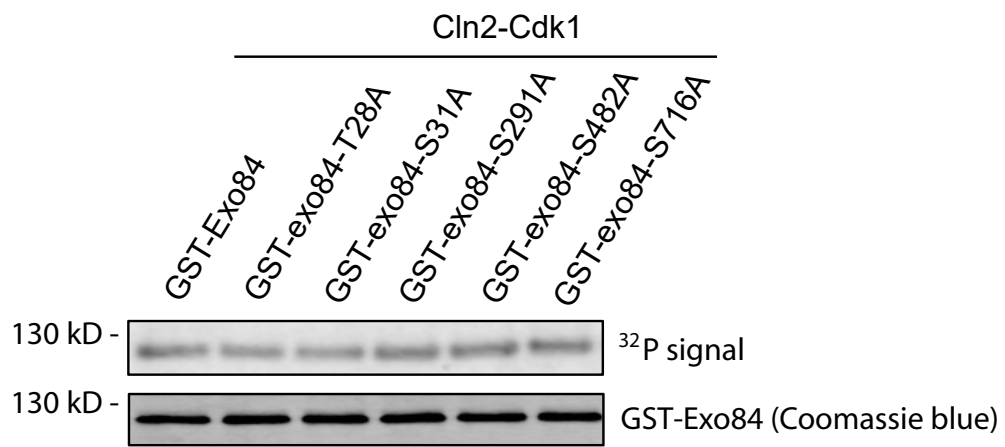

Supplement: supp_RA119.008591_144503_1_supp_343561_ps2j8m.pdf [file supp_RA119.008591_144503_1_supp_343561_ps2j8m.pdf]
